# Supplementary material
Source: PubMed Central journal article supplement (PMC3732484)

Supplementary Figure-S1

A

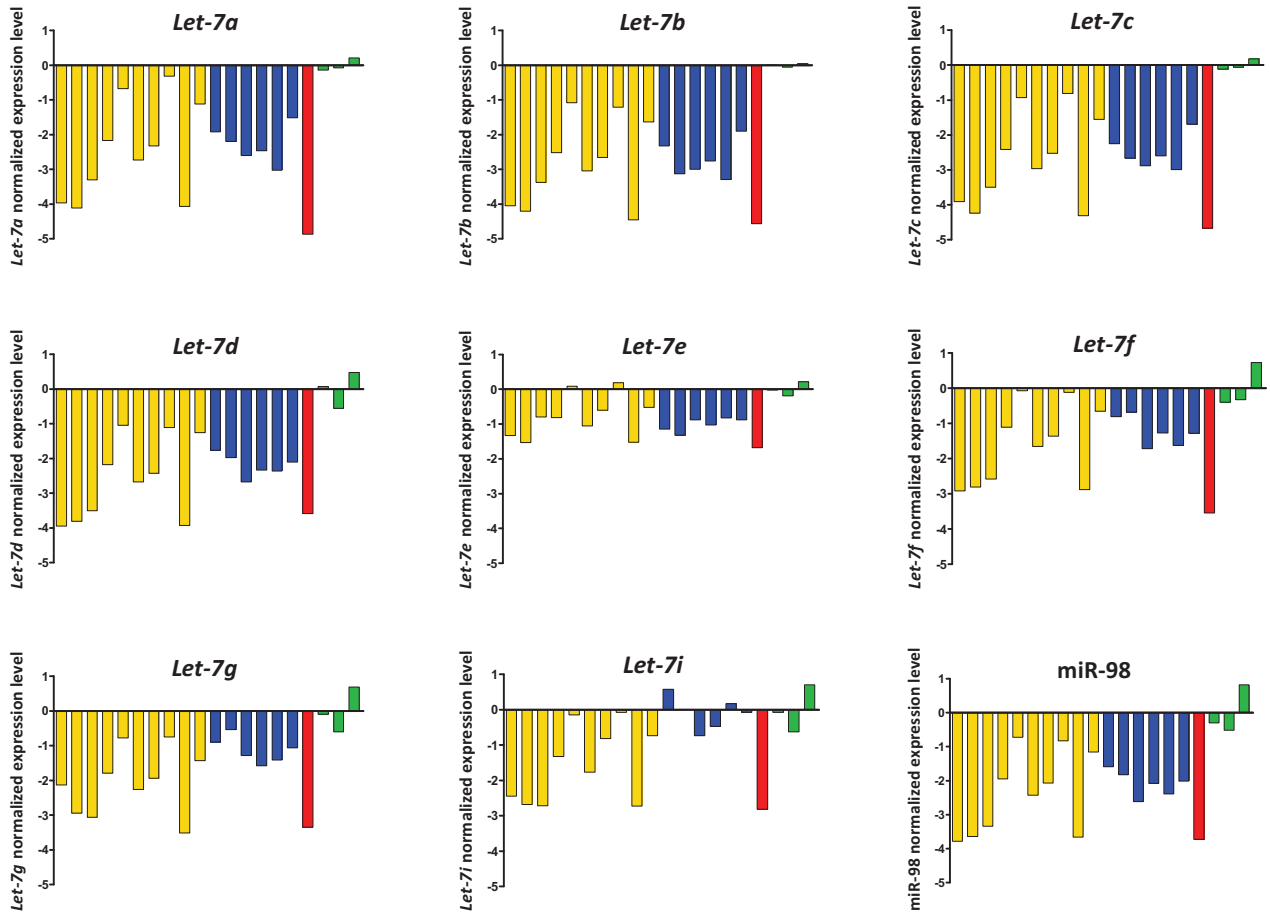

B

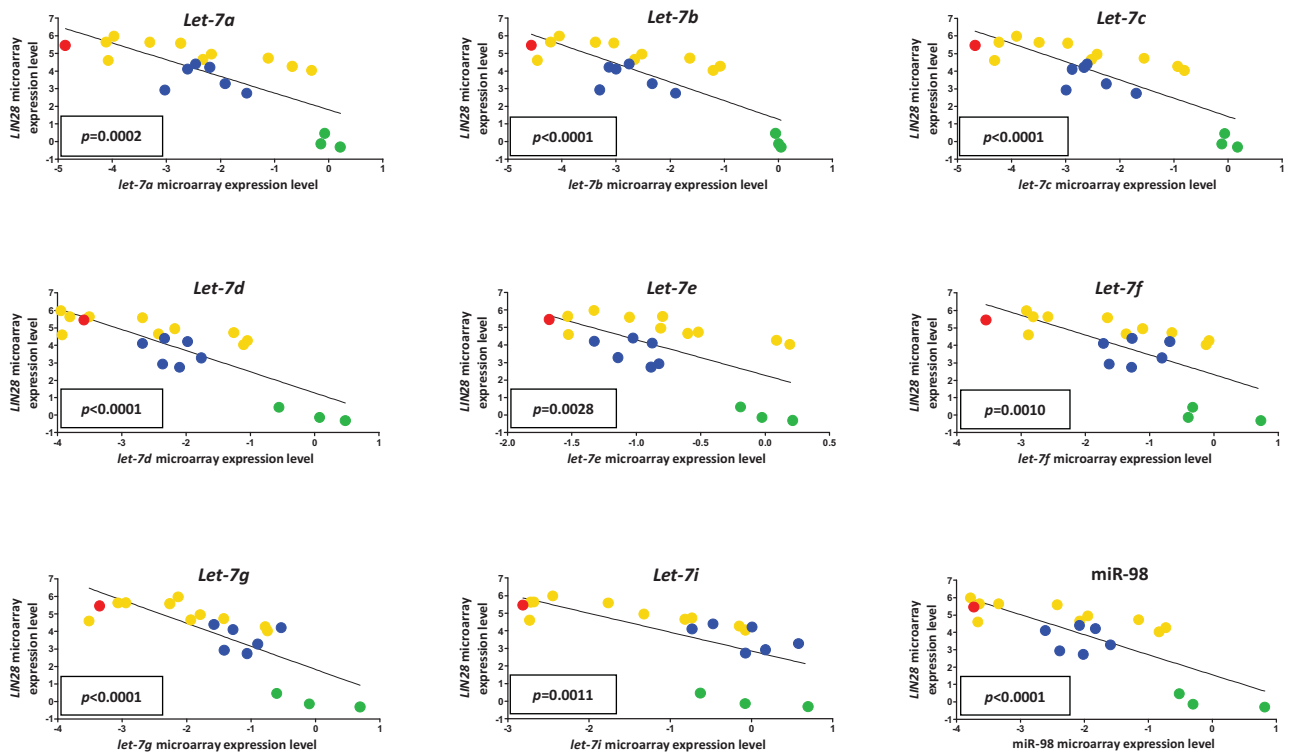

Yolk sac tumor
  Germinoma
  Embryonal carcinoma
  Normal gonad

Supplementary Figure-S2

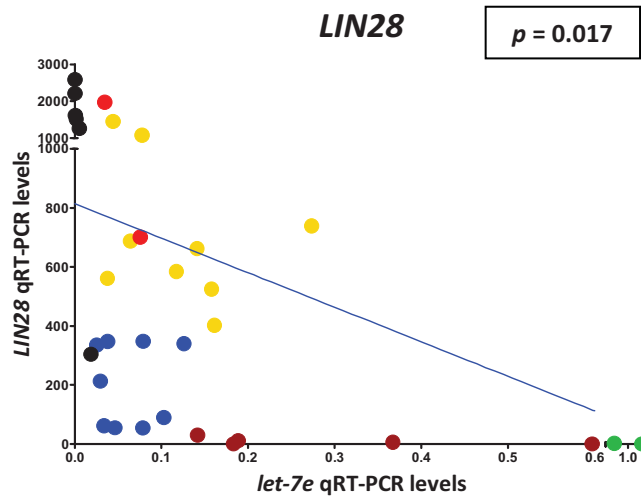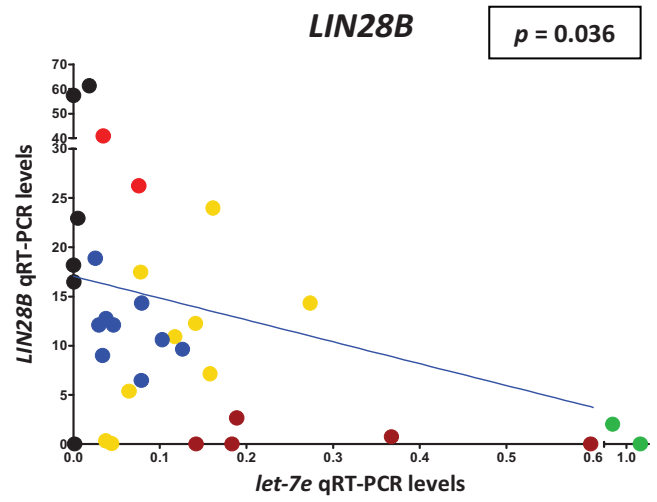

Yolk sac tumor Germinoma Embryonal ca GCT cell line Teratoma Normal gonad

### Supplementary Figure-S3

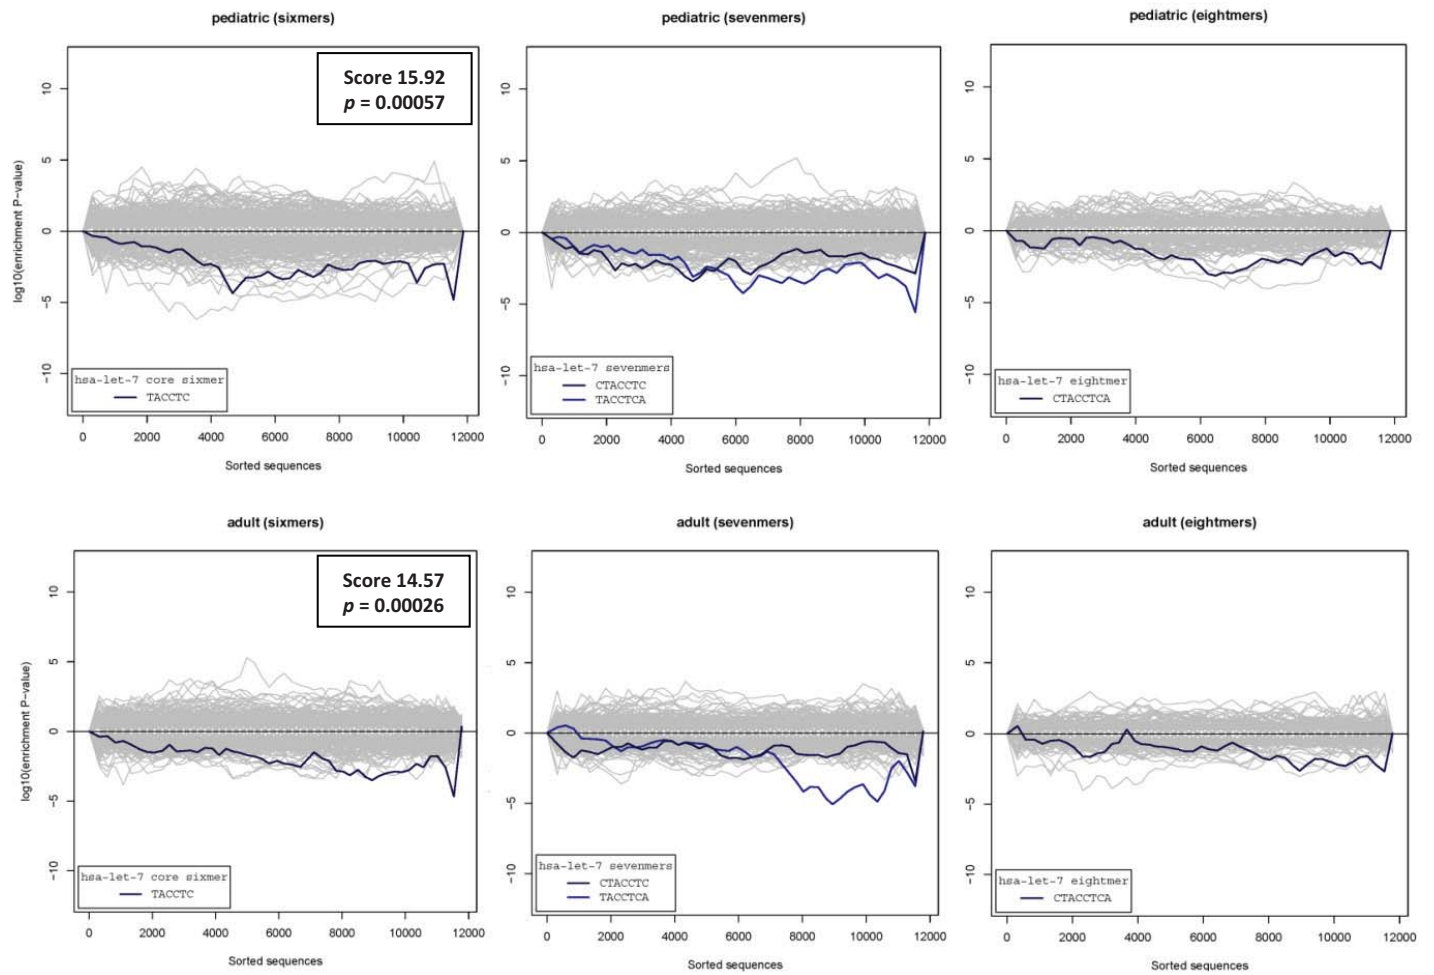

Supplementary Figure-S4

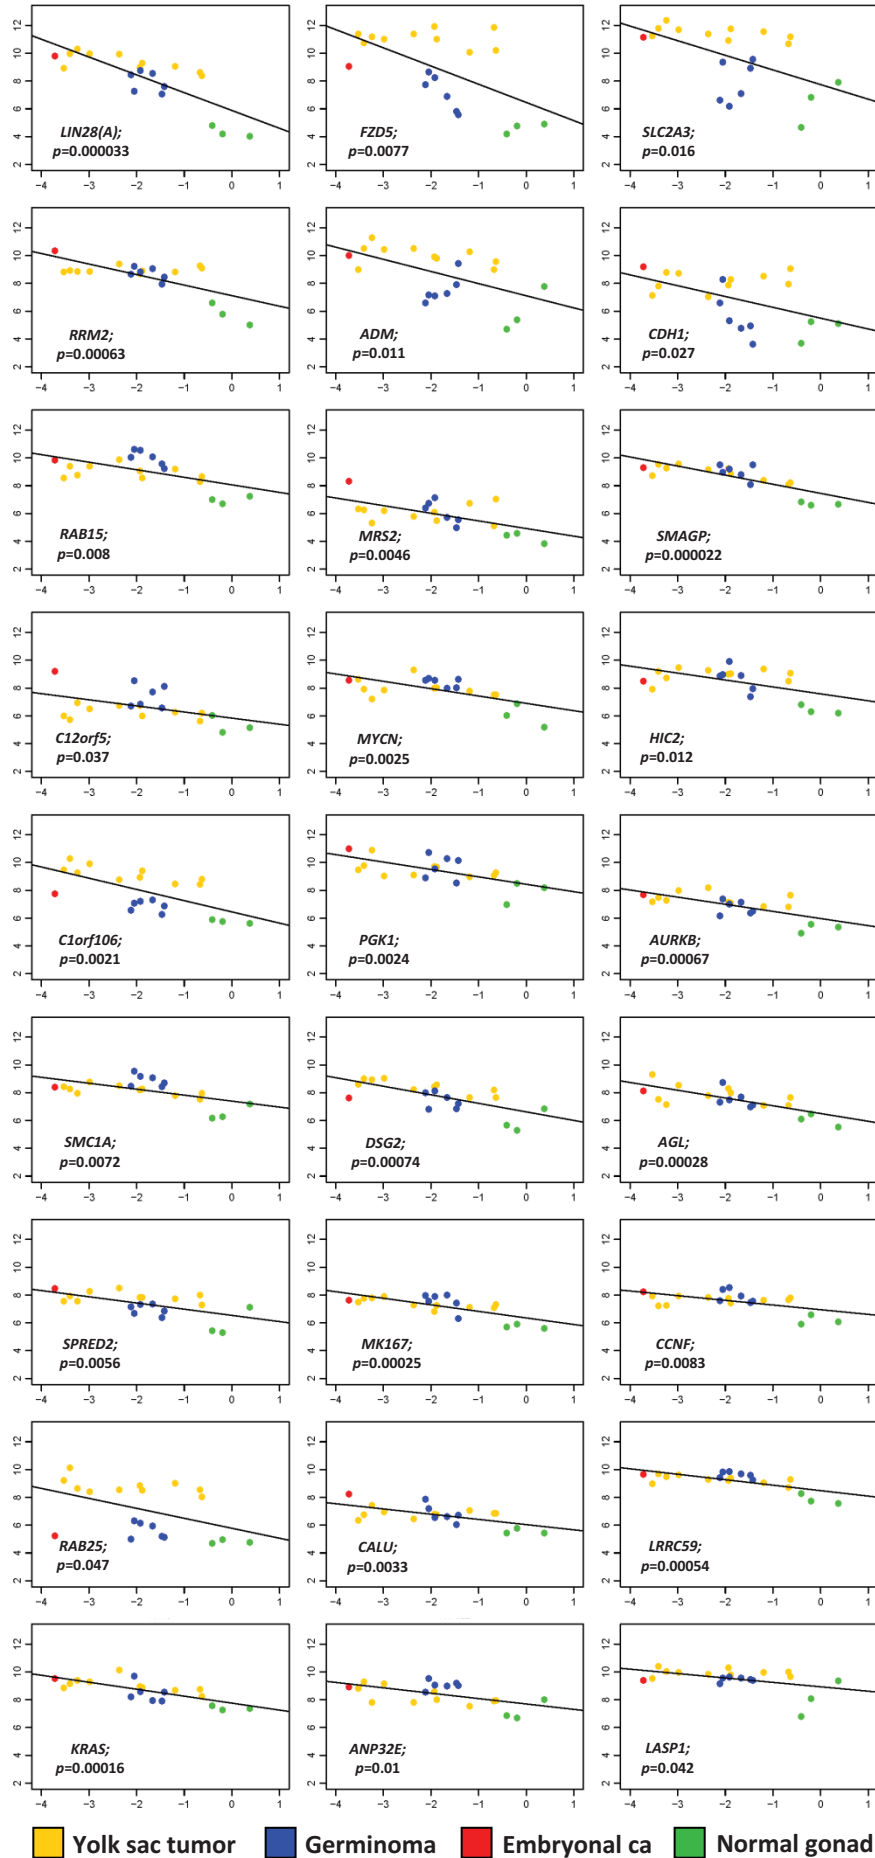

Supplementary Figure-S5

A

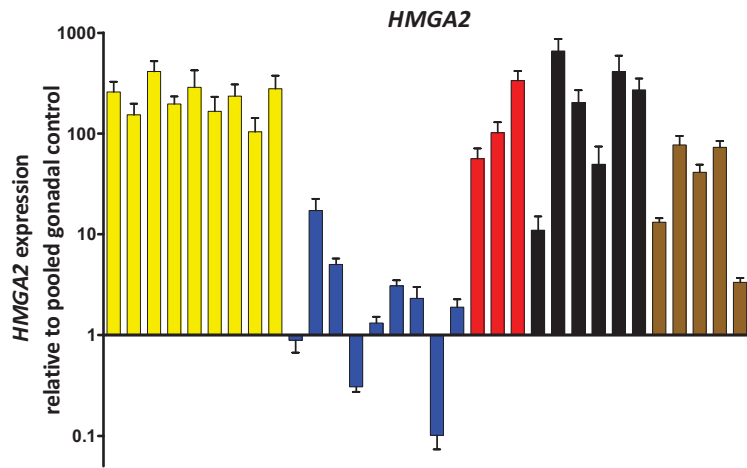

B

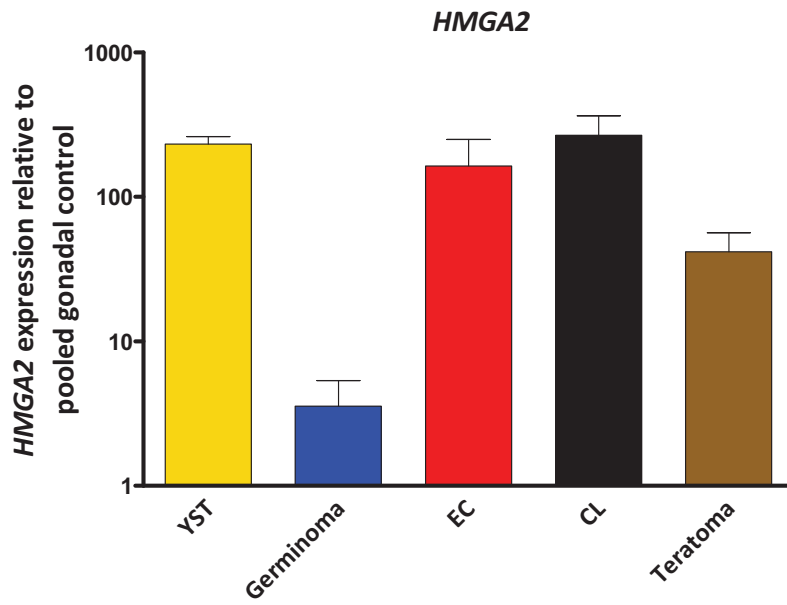

C

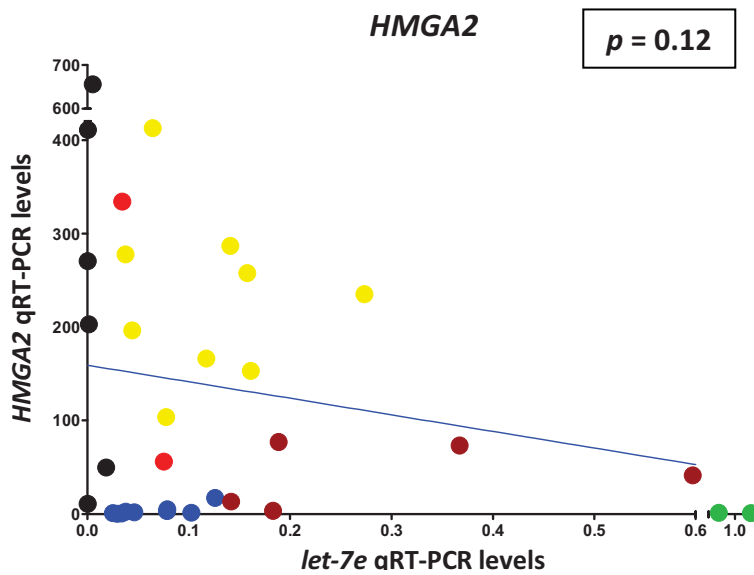

■ Yolk sac tumor  
 ■ Germinoma  
 ■ Embryonal ca  
 ■ GCT cell line  
 ■ Teratoma  
 ■ Normal gonad

Supplementary Figure-S6

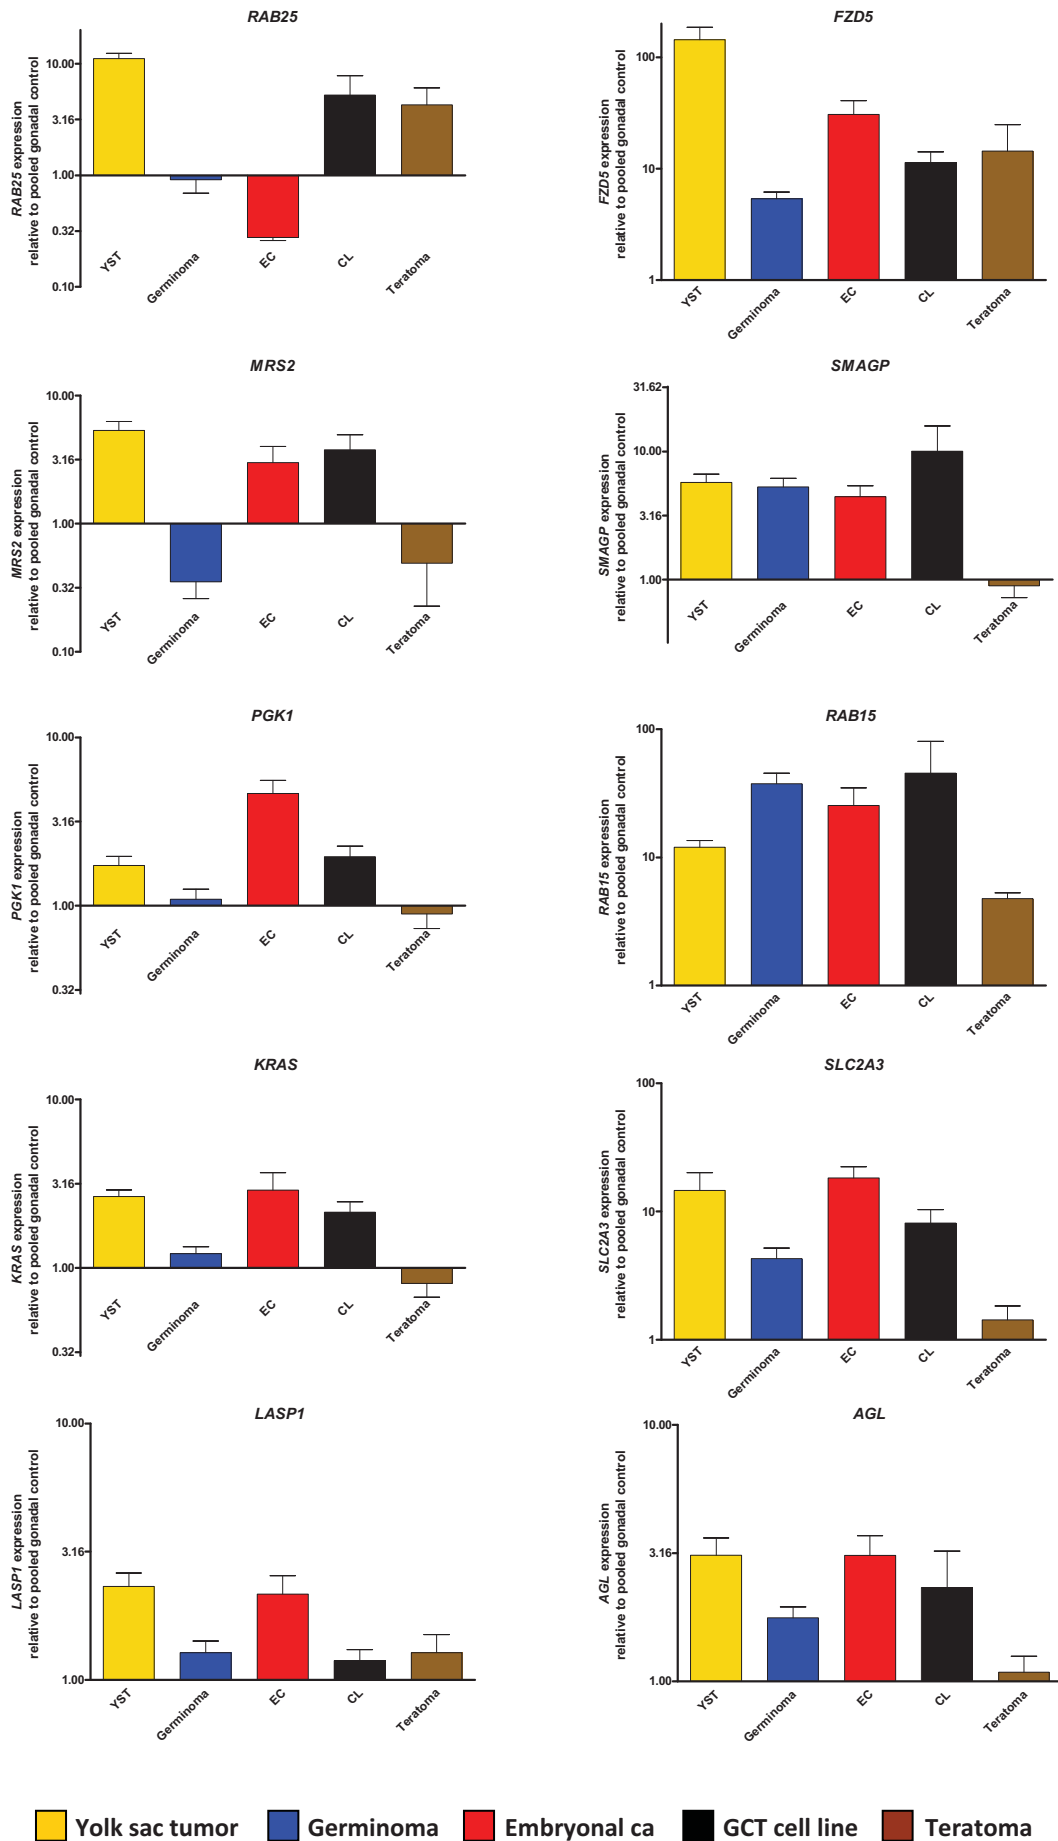

Supplementary Figure-S7

A

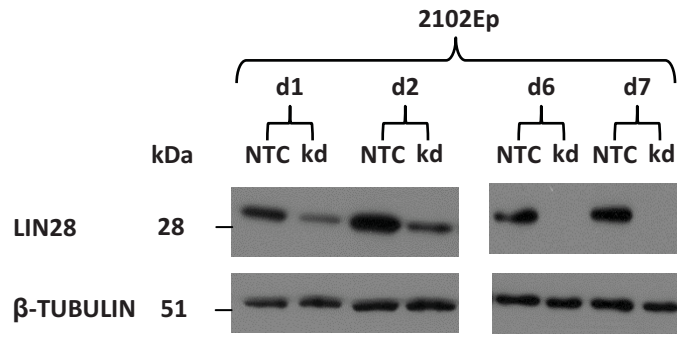

B

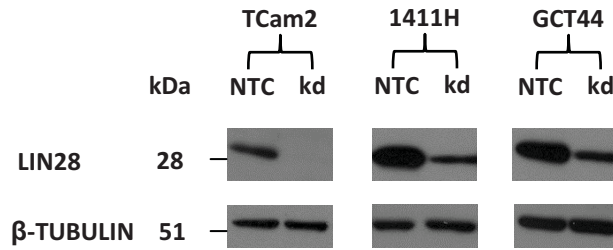

C

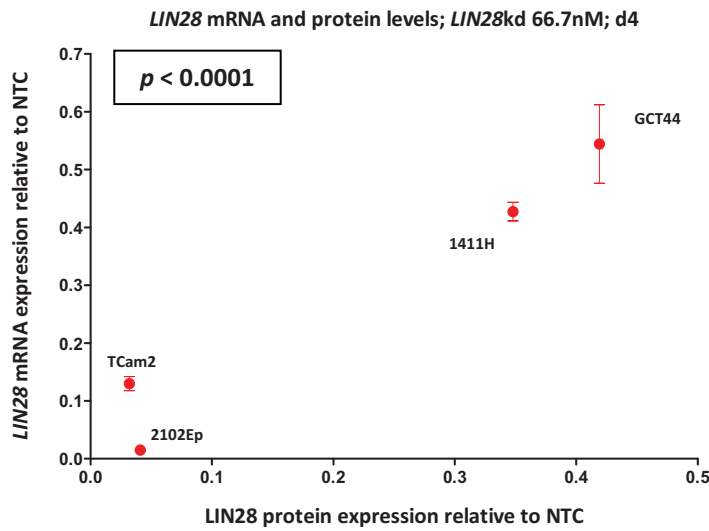

D

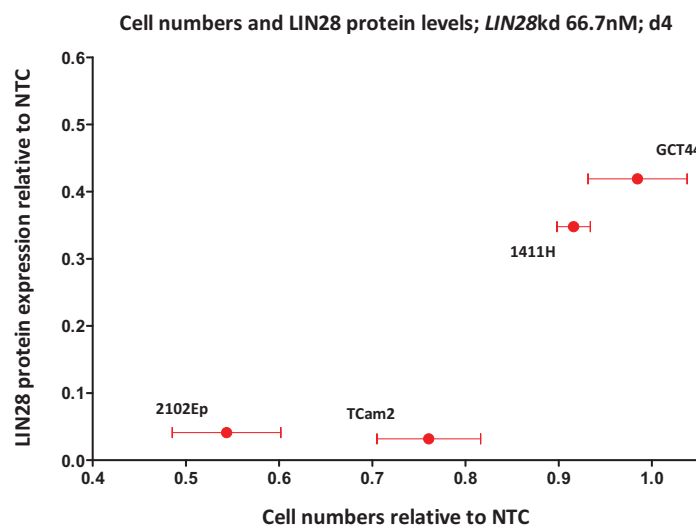

Supplementary Figure-S8

A

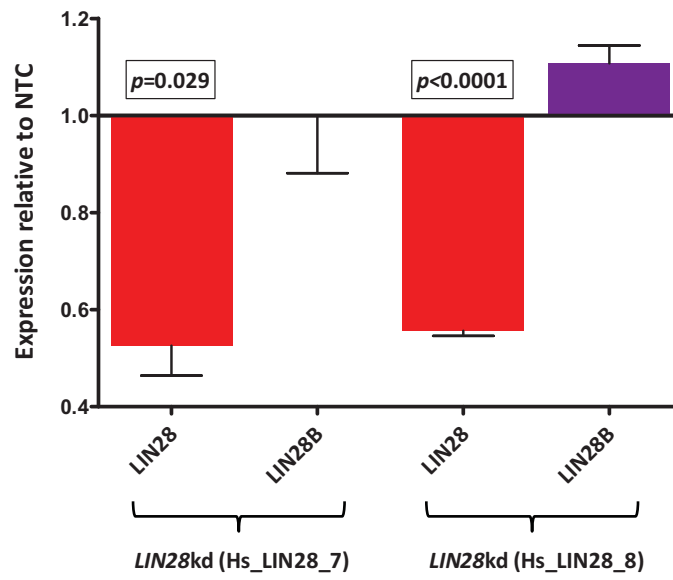

B

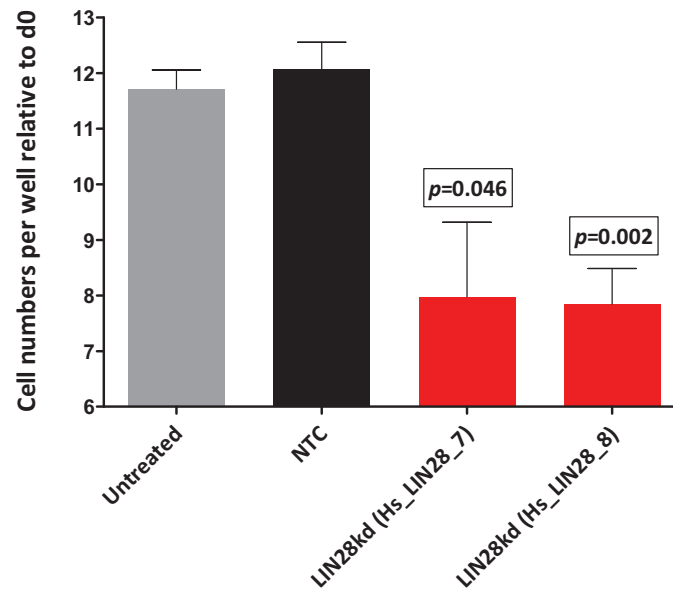

C

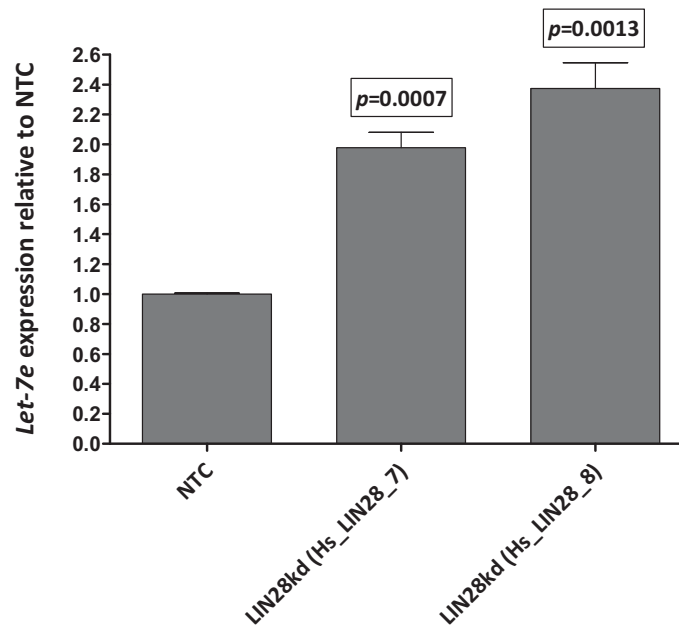



A

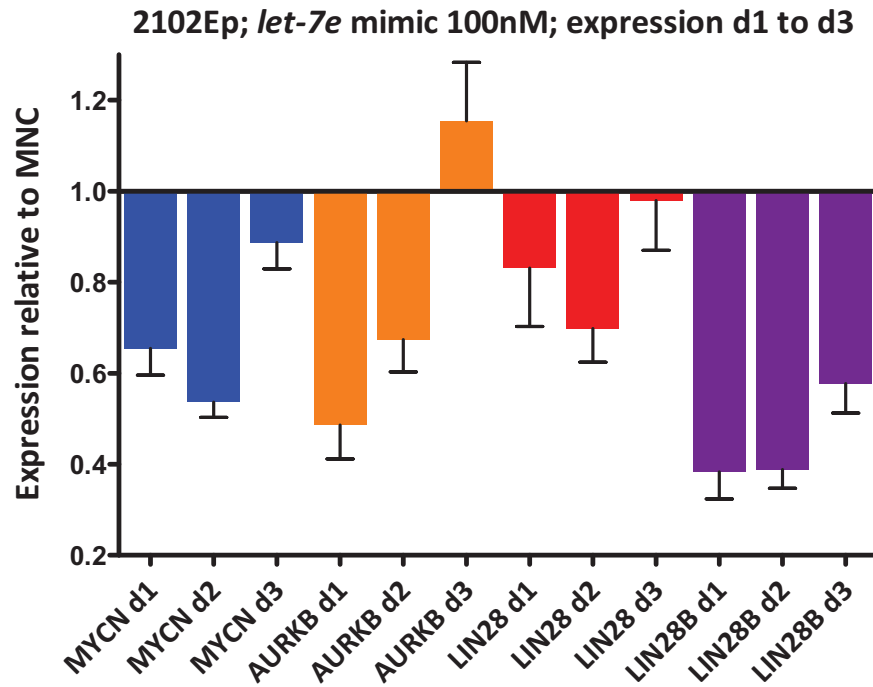

B

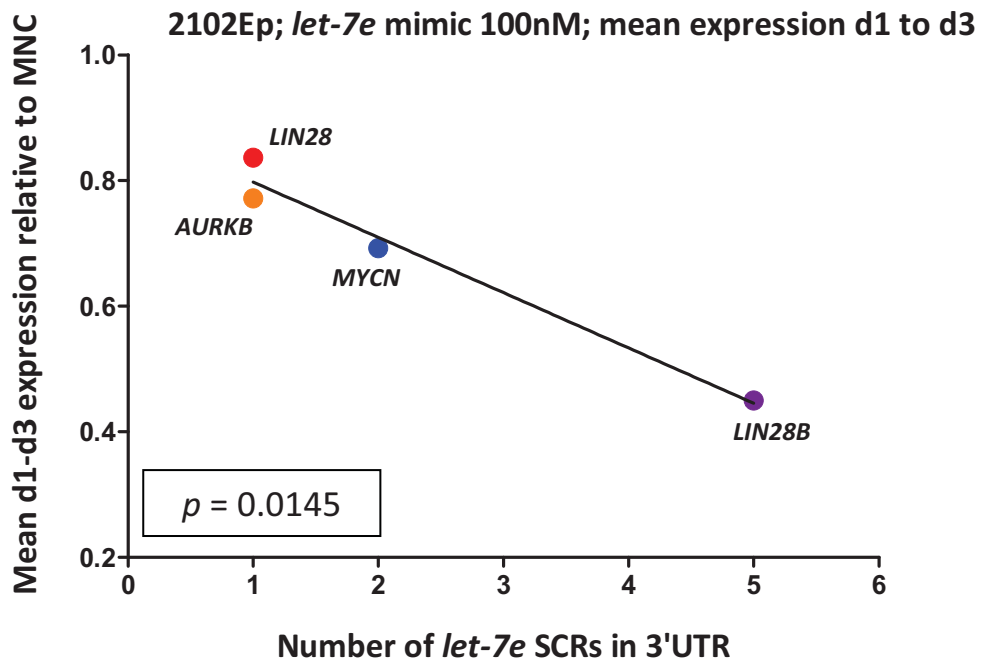

C

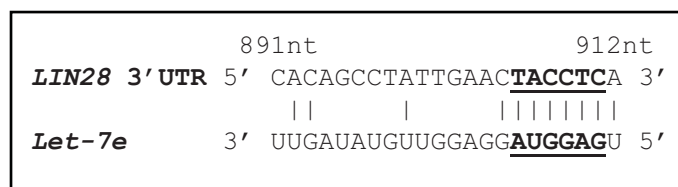

Supplementary Figure-S10

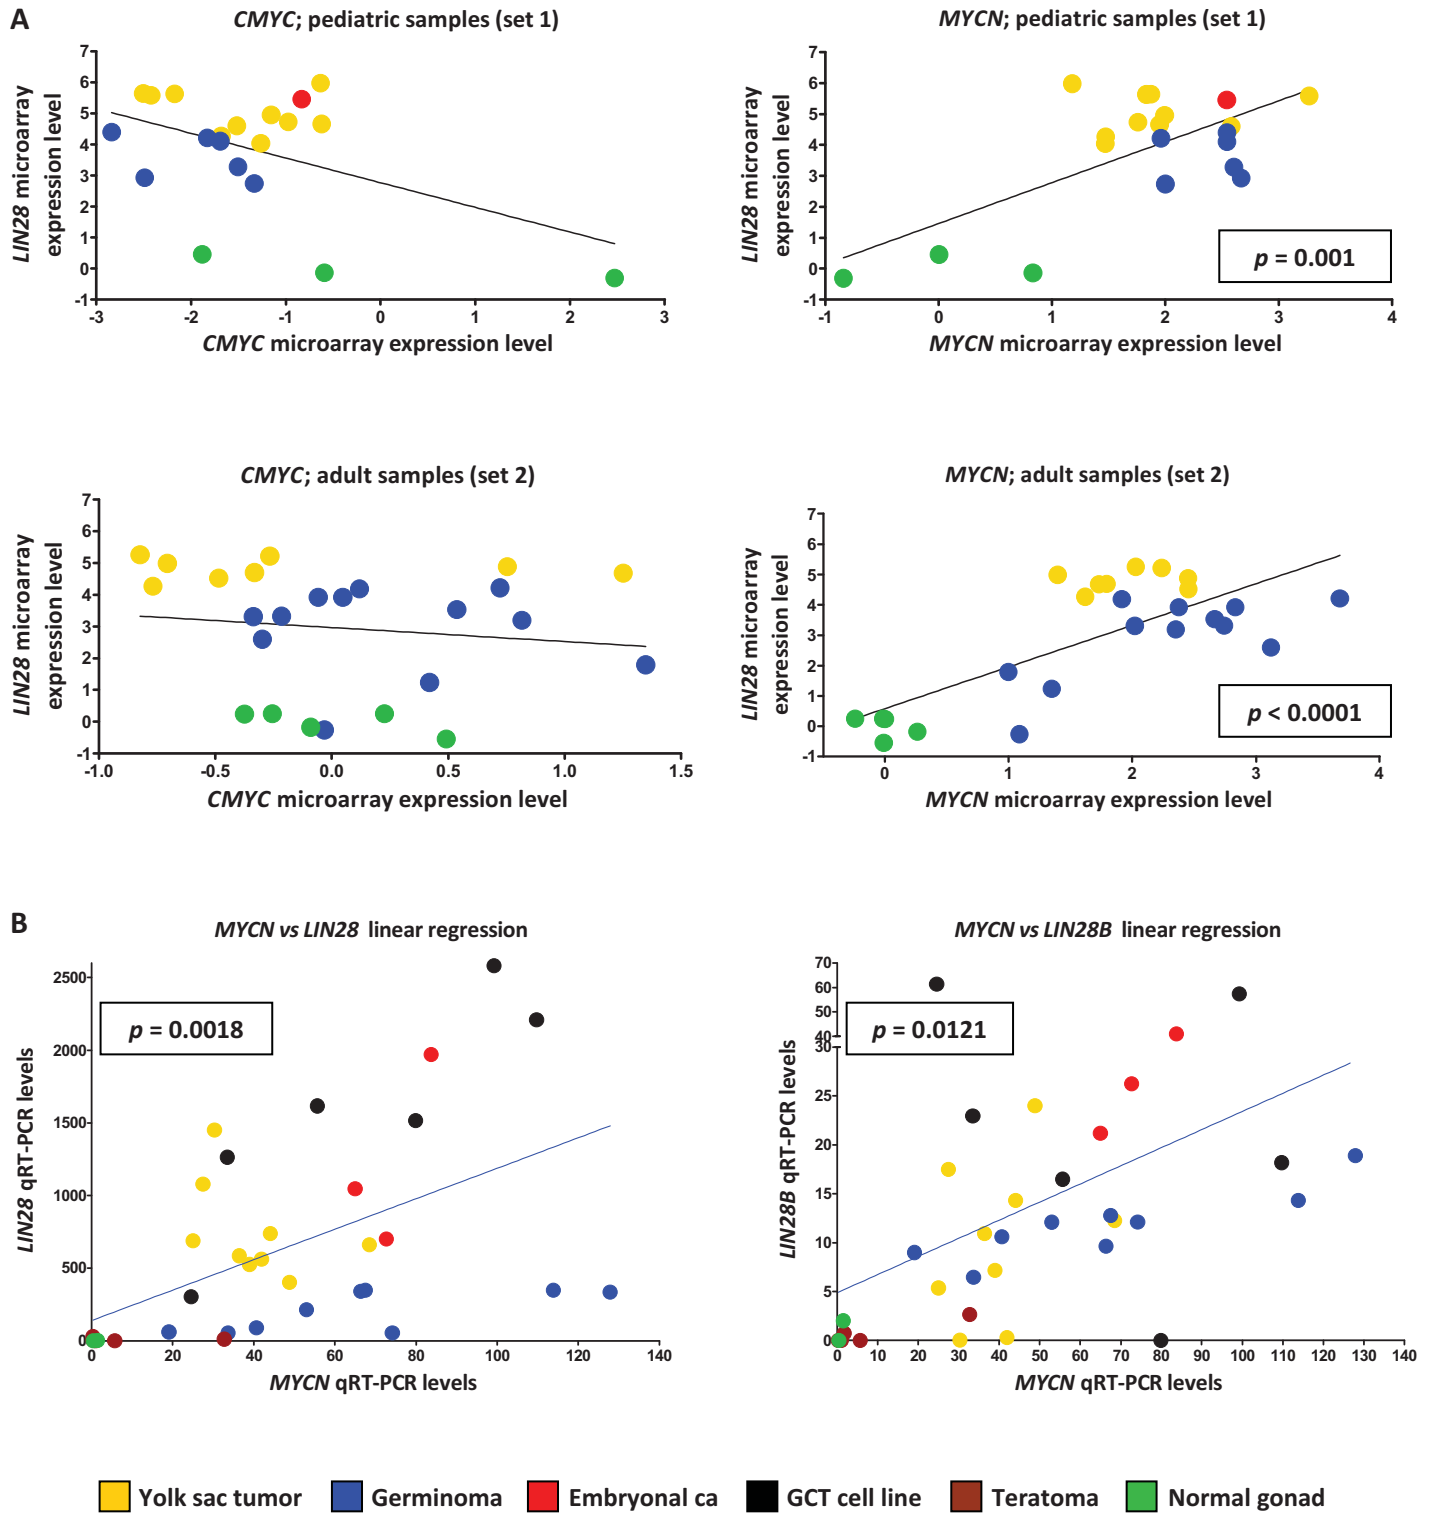

Supplementary Figure-S11

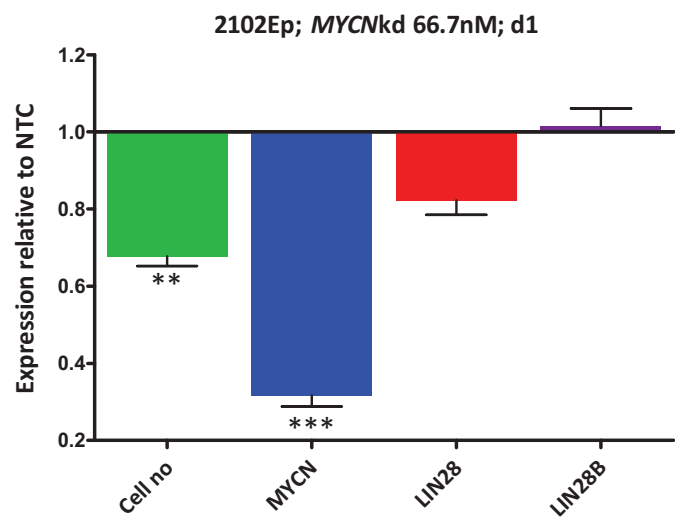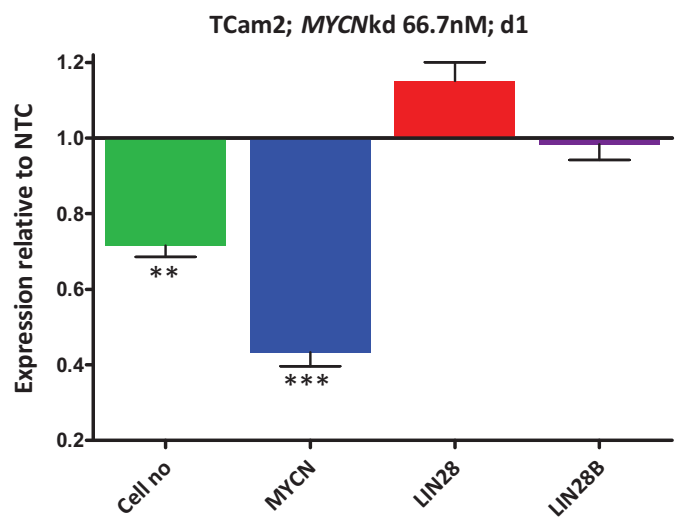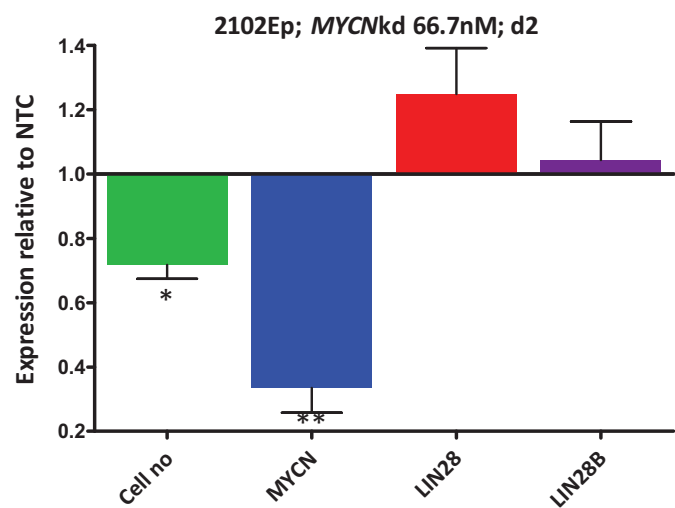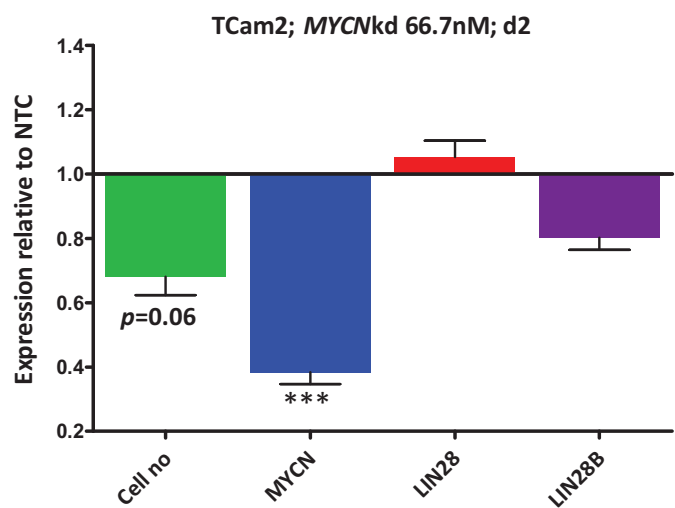

Supplementary Figure-S12

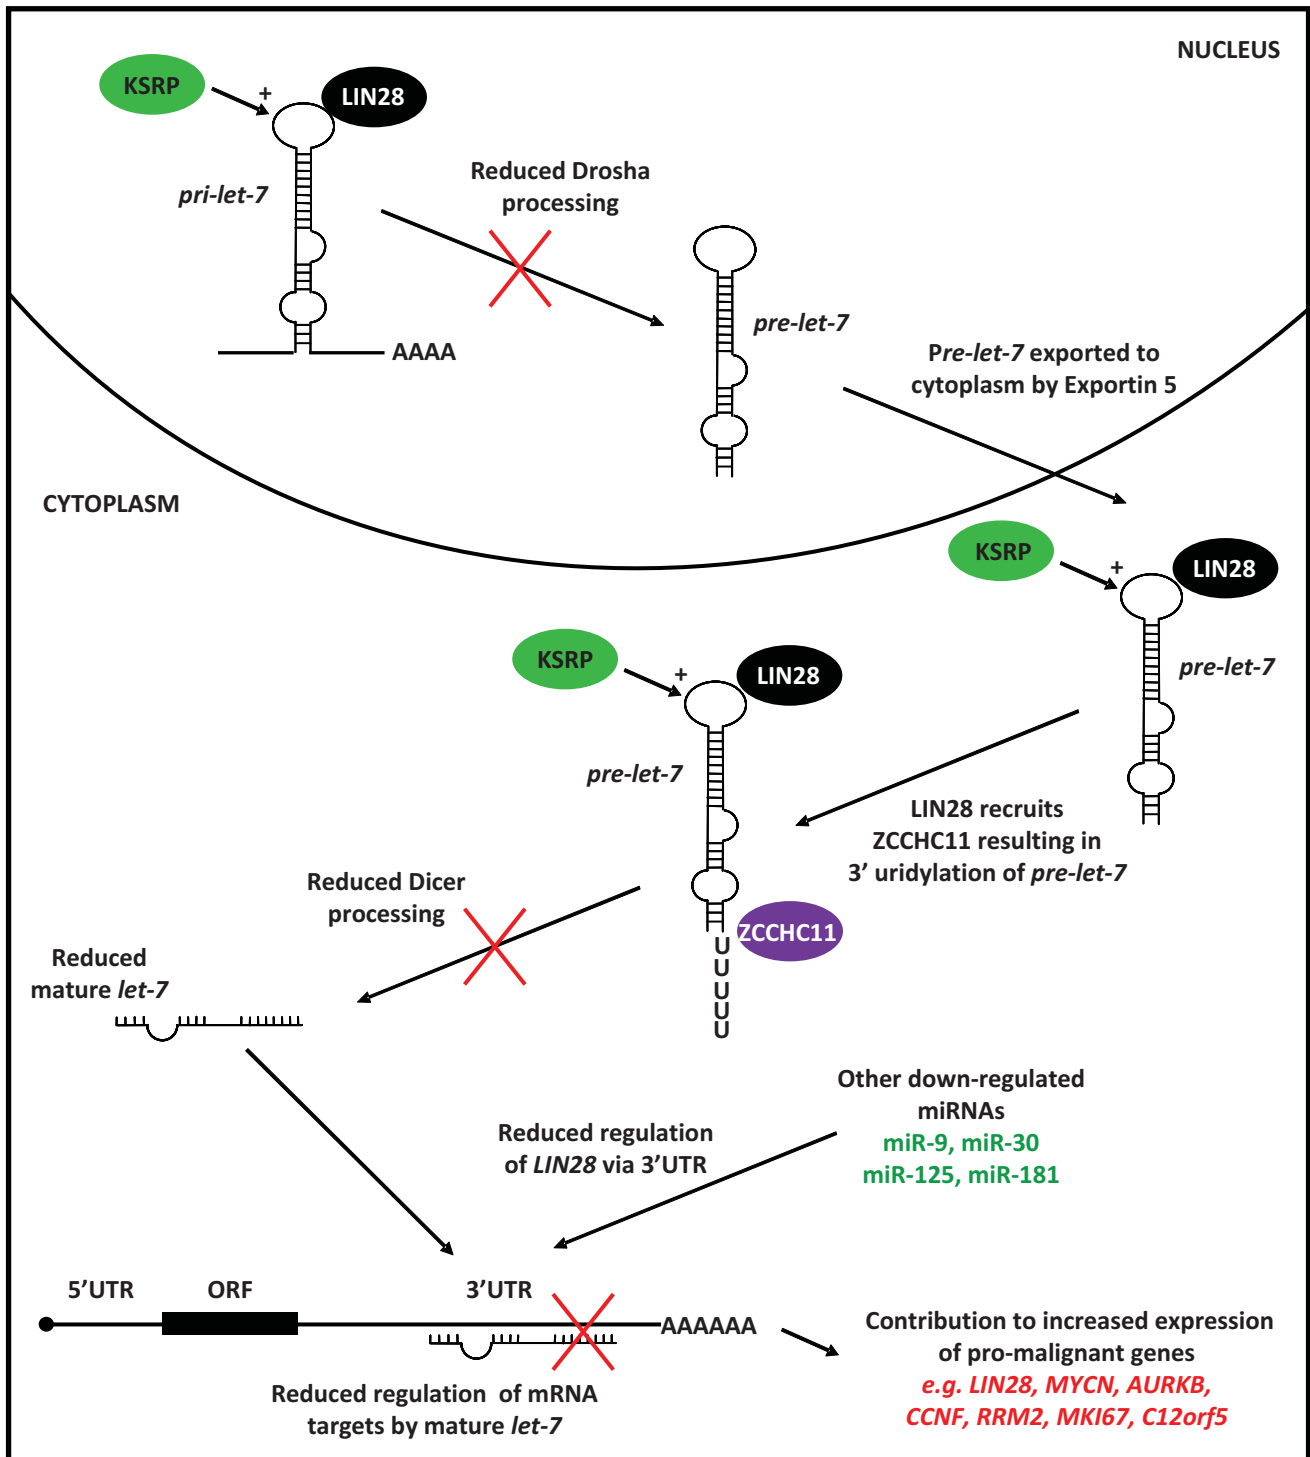

Supplement: NIHMS53719-supplement-3.pdf [file NIHMS53719-supplement-3.pdf]
