# Supplementary material
Source: PubMed Central journal article supplement (PMC3732484)
Supplement: NIHMS53719-supplement-1.pdf [file NIHMS53719-supplement-1.pdf]

## Supplementary Tables

### Supplementary Table-S1

| Sample | Subtype      | Tumor site                       | Age        | Sex | Stage    | Follow-up | microRNA data | mRNA data |
|--------|--------------|----------------------------------|------------|-----|----------|-----------|---------------|-----------|
| 1      | YST          | Ovary                            | 14         | F   | 4        | NED       |               |           |
| 2      | YST          | Vagina                           | 1          | F   | 1        | NED       | ✓             |           |
| 3      | YST          | Testis                           | 1          | M   | 2        | NED       | ✓             | ✓         |
| 4      | YST          | Ovary                            | 4          | F   | 4        | NED       | ✓             |           |
| 5      | YST          | Ovary                            | 2          | F   | 1        | REL       | ✓             | ✓         |
| 6      | YST          | Ovary                            | 13         | F   | 3        | NED       | ✓             | ✓         |
| 7      | YST          | Ovary                            | 14         | F   | 1        | NED       | ✓             | ✓         |
| 8      | YST          | Ovary                            | 12         | F   | 2        | NED       |               |           |
| 9      | YST          | Sacrococcygeal                   | 1          | M   | 4        | NED       |               |           |
| 10     | Germinoma    | Central nervous system           | 12         | M   | N/A      | DOD       |               |           |
| 11     | Germinoma    | Ovary                            | 8          | F   | N/A      | NED       | ✓             |           |
| 12     | Germinoma    | Ovary                            | 14         | F   | 3        | NED       | ✓             |           |
| 13     | Germinoma    | Lymph node metastasis from ovary | 11         | F   | 4        | REL       | ✓             |           |
| 14     | Germinoma    | Ovary                            | 13         | F   | 1        | REL       | ✓             | ✓         |
| 15     | Germinoma    | Testis                           | 25         | M   | 1        | NED       | ✓             |           |
| 16     | Germinoma    | Testis                           | 35         | M   | 1        | NED       | ✓             |           |
| 17     | Germinoma    | Ovary                            | 12         | F   | N/A      | NED       |               |           |
| 18     | Germinoma    | Ovary                            | 9          | F   | 3        | NED       | ✓             |           |
| 19     | Embryonal ca | Testis                           | Adult; N/A | M   | N/A      | N/A       |               |           |
| 20     | Embryonal ca | Testis                           | 15         | M   | N/A      | N/A       | ✓             |           |
| 21     | Embryonal ca | Lung metastasis from testis      | 15         | M   | 4        | REL       | ✓             | ✓         |
| 22     | Cell Line    | N/A                              | N/A        | N/A | N/A      | N/A       | ✓             |           |
| 23     | Cell Line    | N/A                              | N/A        | N/A | N/A      | N/A       | ✓             |           |
| 24     | Cell Line    | N/A                              | N/A        | N/A | N/A      | N/A       | ✓             |           |
| 25     | Cell Line    | N/A                              | N/A        | N/A | N/A      | N/A       | ✓             |           |
| 26     | Cell Line    | N/A                              | N/A        | N/A | N/A      | N/A       | ✓             |           |
| 27     | Cell Line    | N/A                              | N/A        | N/A | N/A      | N/A       | ✓             |           |
| 28     | Teratoma     | Mediastinum                      | 2          | F   | Mature   | NED       |               |           |
| 29     | Teratoma     | Ovary                            | 11         | F   | Immature | NED       |               |           |
| 30     | Teratoma     | Ovary                            | 15         | F   | Immature | NED       | ✓             |           |
| 31     | Teratoma     | Abdominal                        | 0          | M   | Immature | NED       | ✓             |           |
| 32     | Teratoma     | Ovary                            | 3          | F   | Mature   | NED       | ✓             |           |

#### Key

YST = yolk sac tumor; Embryonal ca = embryonal carcinoma; NED = no evidence of disease; REL = relapsed;

DOD = died of disease; N/A not available; ✓ = data available

Supplementary Table-S2

| Gene           | 5' to 3' forward primer sequence | 5' to 3' reverse primer sequence | Product size (bp) |
|----------------|----------------------------------|----------------------------------|-------------------|
| <i>LIN28</i>   | GAAGCGCAGATCAAAAGGAG             | CTGATGCTCTGGCAGAAAGTG            | 114               |
| <i>LIN28B</i>  | GGAGCCCCTGTTTAGGAAGT             | TCAAGGCCACCACAGTTGTA             | 97                |
| <i>ZCCHC11</i> | TGCTTCAGGAATTGAAGACG             | TCATCTATCACAGTGGCATTTC           | 114               |
| <i>MYCN</i>    | ACACCCTGAGCGATTTCAGAT            | CTTGGTGTGGAGGAGGAAC              | 104               |
| <i>CCNF</i>    | CAGCTGCAGAGGACTCACAA             | CCTCCTCAAACAGGTCATGG             | 109               |
| <i>RRM2</i>    | GCTGGAAGTGGGTTTTAGCA             | CCATCCTCTGATACTCGCCTA            | 104               |
| <i>AURKB</i>   | GTCACCCCATCTGCACCTGT             | ACGCCCAATCTCAAAGTCAT             | 144               |
| <i>MKI67</i>   | AGCCCAACCAAAAAGAAAGT             | TTTGTGCCTTCACTTCCACA             | 131               |
| <i>C12orf5</i> | CTCGCTTCGCTCTGACTGTT             | AGCTGCTGCTTGTTTAAATCC            | 119               |
| <i>FZD5</i>    | GCTTCTCAGCGGAGTGACC              | GCTGGGGAGAGACGGTTAG              | 123               |
| <i>SMAGP</i>   | AGAAGATGGAGCCAGCACAG             | GGTGACGTAGCTGCCTTTGT             | 121               |
| <i>PGK1</i>    | AAGCTGGACGTTAAAGGGAAG            | AATTTGATGCTTGGGACAGC             | 116               |
| <i>RAB25</i>   | CGAATGTTTCGCTGAAAACAA            | GTCCGGATGCTGTTCTGTCT             | 140               |
| <i>MRS2</i>    | CGTGAGCTTAGGGTGCTGAT             | GAGAAGGTTCCCATGGTCAG             | 113               |
| <i>KRAS</i>    | GCAAGAGTGCCTTGACGATA             | TCCAAGAGACAGGTTTCTCCA            | 118               |
| <i>SLC2A3</i>  | GACTCTTCGTCAACCGCTTT             | CATAAAGCAGCCACCAGTGA             | 80                |
| <i>LASP1</i>   | GTATCCCACGGAGAAGGTGA             | GTGTCATCTTGCAGGTCTCG             | 80                |
| <i>RAB15</i>   | GGCTGATGAGGAGCAGAAAC             | TCAGACGCGTGAATGACTCT             | 131               |
| <i>AGL</i>     | CCCGGAGACTACTGCAAAGA             | ACTGGGCATTCTCATTGGTC             | 119               |
| <i>HMGA2</i>   | AGCGCCTCAGAAGAGAGGAC             | CTTCCCCTGGGTCTCTTAGG             | 87                |
| <i>YWHAZ</i>   | ACTTTTGGTACATTGTGGCTCAA          | CCGCCAGGACAAACAGTAT              | 95                |
| <i>RPL13A</i>  | CCTGGAGGAGAAGAGGAAAAGAGA         | TTGAGGACCTCTGTGTATTTGTCAA        | 126               |
| <i>HMBS</i>    | GGCAATGCGGCTGCAA                 | GGGTACCCACGCGAATCAC              | 64                |
| <i>ACTB</i>    | Qiagen Hs ACTB 2 SG              | Qiagen Hs ACTB 2 SG              | N/A               |

Supplementary Table-S3

| Rank | microRNA      | 5' to 3' Sequence              | Fold change | Adjusted <i>p</i> -value |
|------|---------------|--------------------------------|-------------|--------------------------|
| 1    | <i>let-7e</i> | <u>UGAGGU</u> AGGAGGUUGUAUAGUU | -2.22       | 4.45 x 10 <sup>-7</sup>  |
| 2    | miR-98        | <u>UGAGGU</u> AGUAAGUUGUAUUGUU | -3.53       | 1.21 x 10 <sup>-5</sup>  |
| 3    | <i>let-7d</i> | <u>UGAGGU</u> AGUAAGUUGUAUUGUU | -3.25       | 4.01 x 10 <sup>-5</sup>  |
| 4    | <i>let-7a</i> | <u>UGAGGU</u> AGUAGGUUGUAUAGUU | -3.68       | 9.19 x 10 <sup>-5</sup>  |
| 5    | <i>let-7c</i> | <u>UGAGGU</u> AGUAGGUUGUAUGGUU | -3.56       | 1.18 x 10 <sup>-4</sup>  |
| 6    | <i>let-7g</i> | <u>UGAGGU</u> AGUAGUUUGUACAGUU | -2.46       | 2.34 x 10 <sup>-4</sup>  |
| 7    | <i>let-7b</i> | <u>UGAGGU</u> AGUAGGUUGUGUGGUU | -3.43       | 3.41 x 10 <sup>-4</sup>  |
| 8    | <i>let-7f</i> | <u>UGAGGU</u> AGUAGAUUGUAUAGUU | -2.36       | 8.56 x 10 <sup>-4</sup>  |
| 9    | <i>let-7i</i> | <u>UGAGGU</u> AGUAGUUUGUGCUGUU | -2.23       | 2.63 x 10 <sup>-3</sup>  |

Supplementary Table-S4

| Gene            | Accession Number | Chromosomal Location | Pediatric rank (n=50) | Pediatric log <sub>2</sub> fold change | Adult rank (n=106) | Adult log <sub>2</sub> fold change | <i>Let-7</i> linear regression <i>p</i> -value (microarray) |
|-----------------|------------------|----------------------|-----------------------|----------------------------------------|--------------------|------------------------------------|-------------------------------------------------------------|
| <i>LIN28</i>    | NM_024674        | 1p36.11              | 1                     | 4.69                                   | 3                  | 3.86                               | 0.000033                                                    |
| <i>FZD5</i>     | NM_003468        | 2q33.3               | 2                     | 4.48                                   | 1                  | 5.27                               | 0.0077                                                      |
| <i>SLC2A3</i>   | AB209607         | 12p13.3              | 3                     | 3.73                                   | 2                  | 5.24                               | 0.016                                                       |
| <i>RRM2</i>     | NM_001034        | 2p24-25              | 4                     | 3.54                                   | 27                 | 2.40                               | 0.00063                                                     |
| <i>ADM</i>      | NM_001124        | 11p15.4              | 5                     | 3.25                                   | 19                 | 2.53                               | 0.011                                                       |
| <i>CDH1</i>     | NM_004360        | 16q22.1              | 6                     | 2.95                                   | 4                  | 3.74                               | 0.027                                                       |
| <i>RAB15</i>    | NM_198686        | 14q23.3              | 7                     | 2.63                                   | 14                 | 2.60                               | 0.008                                                       |
| <i>MRS2</i>     | NM_020662        | 6p22.1-3             | 8                     | 2.54                                   | 36                 | 2.24                               | 0.0046                                                      |
| <i>SMAGP</i>    | NM_001031628     | 12q13.3              | 10                    | 2.37                                   | 60                 | 1.93                               | 0.000022                                                    |
| <i>C12orf5</i>  | NM_020375        | 12p13.3              | 11                    | 2.29                                   | 102                | 1.57                               | 0.037                                                       |
| <i>MYCN</i>     | NM_005378        | 2p24.3               | 12                    | 2.29                                   | 43                 | 2.11                               | 0.0025                                                      |
| <i>HIC2</i>     | NM_015094        | 22q11.21             | 13                    | 2.28                                   | 96                 | 1.63                               | 0.012                                                       |
| <i>C1orf106</i> | NM_001142569     | 1q32.1               | 18                    | 2.17                                   | 31                 | 2.31                               | 0.0021                                                      |
| <i>PGK1</i>     | NM_000291        | Xq13.3               | 20                    | 2.17                                   | 24                 | 2.42                               | 0.0024                                                      |
| <i>AURKB</i>    | NM_004217        | 17p13.1              | 22                    | 1.99                                   | 52                 | 2.01                               | 0.00067                                                     |
| <i>SMC1A</i>    | NM_006306        | Xp11.21-22           | 24                    | 1.95                                   | 34                 | 2.29                               | 0.0072                                                      |
| <i>DSG2</i>     | NM_001943        | 18q12.1              | 25                    | 1.90                                   | 18                 | 2.53                               | 0.00074                                                     |
| <i>AGL</i>      | NM_000028        | 1p21                 | 28                    | 1.82                                   | 48                 | 2.03                               | 0.00028                                                     |
| <i>SPRED2</i>   | NM_001128210     | 2p14                 | 29                    | 1.81                                   | 37                 | 2.21                               | 0.0056                                                      |
| <i>MKI67</i>    | NM_001145966     | 10q26.2              | 32                    | 1.78                                   | 78                 | 1.78                               | 0.00025                                                     |
| <i>CCNF</i>     | NM_001761        | 16p13.3              | 33                    | 1.75                                   | 94                 | 1.64                               | 0.0083                                                      |
| <i>RAB25</i>    | NM_020387        | 1q22                 | 34                    | 1.74                                   | 15                 | 2.60                               | 0.047                                                       |
| <i>CALU</i>     | NM_001130674     | 7q32.1               | 35                    | 1.74                                   | 81                 | 1.76                               | 0.0033                                                      |
| <i>LRRC59</i>   | NM_018509        | 17q21.33             | 39                    | 1.66                                   | 55                 | 1.97                               | 0.00054                                                     |
| <i>KRAS</i>     | NM_004985        | 12p12.1              | 43                    | 1.61                                   | 64                 | 1.88                               | 0.00016                                                     |
| <i>ANP32E</i>   | NM_001136478     | 1q21.2               | 47                    | 1.56                                   | 29                 | 2.38                               | 0.01                                                        |
| <i>LASPI</i>    | NM_006148        | 17q11-q21.3          | 50                    | 1.52                                   | 22                 | 2.45                               | 0.042                                                       |

**Supplementary Table-S5**

| <b>Gene</b>    | <b>Accession Number</b> | <b><i>Let-7</i> linear regression <i>p</i>-value (qRT-PCR)</b> | <b>Function / Role in Cancer</b>                                                                                                                             |
|----------------|-------------------------|----------------------------------------------------------------|--------------------------------------------------------------------------------------------------------------------------------------------------------------|
| <i>RRM2</i>    | NM_001034               | 0.0029                                                         | Ribonucleotide reductase 2; catalyzes generation of deoxyribonucleotides; regulates cellular proliferation (1)                                               |
| <i>C12orf5</i> | NM_020375               | 0.0246                                                         | TP53 induced glycolysis and apoptosis regulator (TIGAR); anti-apoptotic (2); depletion radiosensitizes glioma cells (3)                                      |
| <i>MYCN</i>    | NM_005378               | 0.0018                                                         | Transcription factor; known to be up-regulated in malignant GCTs (4); levels in neuroblastoma associated with poor outcome (5)                               |
| <i>AURKB</i>   | NM_004217               | 0.0106                                                         | Aurora kinase B; high expression associated with unfavorable cytogenetic abnormalities in leukemia (6); AURKB inhibitor cytotoxic to neuroblastoma cells (7) |
| <i>MKI67</i>   | NM_001145966            | 0.015                                                          | Cell proliferation marker (Ki67); high Ki-67 index associated with increased risk of relapse in malignant GCTs (8)                                           |
| <i>CCNF</i>    | NM_001761               | 0.0006                                                         | Cyclin F; regulator of mitosis and genome integrity (9)                                                                                                      |
