# Supplementary material
Source: PubMed Central journal article supplement (PMC3732484)
Supplement: NIHMS53719-supplement-2.pdf [file NIHMS53719-supplement-2.pdf]

## Legends to Supplementary Figures

**Supplementary Figure-S1. Levels of the nine members of the *let-7* family in pediatric malignant-GCTs.** A) Levels were determined in 20 samples from set-1 with matched microRNA and mRNA profiling. Values were determined from microarray data and were normalized to the mean of the three normal gonadal control samples. B) Linear-regression analysis of each individual *let-7* family member versus *LIN28* levels for the set-1 samples. The data are color-coded by sample type, as in the key.

**Supplementary Figure-S2. PCR quantification of *let-7e*, *LIN28* and *LIN28B* in malignant-GCTs.** The graphs show levels of *let-7e* versus levels of *LIN28* (left) and *LIN28B* (right). All values were determined by qRT-PCR in sample set-3. Correlation *p*-values were determined by linear-regression. The data are color-coded by sample type, as in the key.

**Supplementary Figure-S3. *Sylamer* analysis of up-regulated genes in pediatric and adult malignant-GCTs.** *Sylamer* landscape plots for SCR words corresponding to the common seed of the nine *let-7* microRNA family members, in pediatric malignant-GCTs (set-1; top panel) and adult malignant-GCTs (set-2; lower panel). Log<sub>10</sub>-transformed and sign-adjusted enrichment *p*-values for each SCR word, relative to *p*-values of all other words, are plotted on the *y*-axis, against the ranked gene list on the *x*-axis (orientated with down-regulated genes to the left and up-regulated genes to the right). A negative *y*-axis deflection on the right-hand side of the plot therefore signifies SCR enrichment in up-

regulated genes. For each comparison, the left-hand plot shows data for the hexamer complementary to the core 2-7nt component of the common seed-region, the central plot the two heptamers (1-7nt; 2-8nt), and the right-hand plot the octamer (1-8nt). The single summed significance score and *p*-value for all four SCR words in each comparison are given in each left-hand plot.

**Supplementary Figure-S4. Correlations between levels of *let-7* and mRNA targets.** In each graph, the *x*-axis shows median levels of the nine *let-7* family members, while the *y*-axis shows levels of each mRNA. Data were obtained from microarray analyses of the 20 pediatric malignant-GCTs from set-1 with matched microRNA and mRNA profiling. Correlation *p*-values were determined by linear-regression. Samples are color-coded, as in the key.

**Supplementary Figure-S5. PCR quantification of *HMGA2* in pediatric malignant-GCTs.** The graphs show: A) *HMGA2* levels in the 32 samples from set-3; B) mean expression levels of *HMGA2* in GCTs of different histologic types from set-3; and C) linear-regression analysis of *HMGA2* versus *let-7e* levels. CL = cell-line. Error-bars=SEM. Samples are color-coded, as in the key.

**Supplementary Figure-S6. PCR validation of expression of selected *let-7* mRNA targets in pediatric malignant-GCTs.** The graphs show mean qRT-PCR expression the 32 samples from set-3. The left-hand column shows mRNAs over-expressed in malignant-GCTs of particular histologic subtypes, compared to the control samples used, while the

right-hand column shows mRNAs that were over-expressed in all malignant GCT subtypes. Error-bars=SEM. Samples are color-coded, as in the key.

**Supplementary Figure-S7. Effects of *LIN28* depletion in malignant-GCT cells.** A) Western blots showing LIN28 protein expression in 2102Ep on d1, d2, d6 and d7 following *LIN28* depletion, compared with NTC-treated cells. For corresponding western blots for d3-d5, see Figure-3A. By densitometry, LIN28 protein levels were 30-40% of those in NTC-treated cells on d1 and d2 and <10% on d3 to d7. B) Western blots showing LIN28 expression on d4 following *LIN28* depletion in TCam2 (left), 1411H (centre) and GCT44 (right), compared with NTC-treated cells. C) The graph plots LIN28 protein vs. transcript levels for all four malignant-GCT cell-lines on d4 following *LIN28* depletion. All values were compared with NTC-treated cells. D) Relationship between LIN28 protein levels and cell growth in all four malignant-GCT cell-lines on d4 following *LIN28* depletion. All values were compared with NTC-treated cells. NTC=non-targeting-control siRNA, kd=knockdown. Protein levels were quantified by densitometry. Correlation *p*-values were determined by linear-regression. Error-bars=SEM.

**Supplementary Figure-S8. Independent confirmation of specific effects of *LIN28* depletion in malignant-GCT cells.** A) *LIN28* and *LIN28B* levels in 2102Ep cells on d4 following transfection with two independent *LIN28* siRNAs (Hs\_LIN28\_7, left; Hs\_LIN28\_8, right) at 66.7nM, as measured by qRT-PCR. Treatment with each siRNA resulted in significant depletion of *LIN28*, but not *LIN28B*. NTC = Qiagen AllStars non-targeting-control siRNA (catalogue number 1027280), at 66.7nM; kd=knockdown. B) Cell numbers on d4, relative to

d0, in the experiments shown in A). Treatment with each siRNA resulted in significantly reduced cell numbers compared with NTC-treated cells. C) Levels of *let-7e* on d4 in the experiments shown in A) and B). Treatment with each siRNA resulted in significantly increased *let-7e* levels compared with NTC-treated cells. Error-bars=SEM.

**Supplementary Figure-S9. Effects of *let-7e* mimic in malignant-GCT cells.** A) Levels of four *let-7* mRNA targets (*MYCN*, *AURKB*, *LIN28* and *LIN28B*) at d1-d3 following transfection of 2102Ep with *let-7e* mimic, referenced to cells treated with mimic negative control (MNC). B) Mean expression of each mRNA over d1-d3 versus the number of *let-7* SCRs in the 3'UTR of each gene. The correlation *p*-value was determined by linear-regression. C) Depiction of the *let-7e* SCR in the *LIN28* 3'UTR. *Let-7e* is used as a representative *let-7* family member. The 2-7nt seed and the corresponding SCR sequence are underlined.

**Supplementary Figure-S10. Relationships between *MYCN* and *C-MYC* versus *LIN28* and *LIN28B* in malignant-GCTs.** A) Microarray levels of *CMYC* (left) and *MYCN* (right) versus *LIN28* in pediatric samples (upper panel; set-1) and adult samples (lower panel; set-2). B) qRT-PCR levels of *MYCN* versus *LIN28* (left) and *LIN28B* (right), as determined in sample set-3. All correlation *p*-values were determined by linear-regression. Samples are color-coded, as in the key.

**Supplementary Figure-S11. *MYCN* depletion in malignant-GCTs.** Cell numbers and qRT-PCR expression levels of *MYCN*, *LIN28* and *LIN28B* on d1 and d2 following *MYCN* depletion

in 2102Ep (left) and TCam2 (right), referenced to NTC-treated cells. Error-bars=SEM.  $*=p<0.05$ ;  $**=p<0.005$ ;  $***=p\leq 0.0001$ . *MYCN* depletion was also confirmed at the protein level by Western blot in 2102Ep cells on both d1 and d2 following *MYCN* depletion. Levels were reduced to 60.2% and 60.7%, respectively (data not shown).

**Supplementary Figure-S12. Schematic of the *LIN28/let-7* axis in malignant-GCTs.**

In the nuclei of malignant-GCT cells, LIN28 binds the stem-loop of *pri-let-7*, preventing processing by Drosha, most likely resulting in rapid degradation of primary transcripts. The *pre-let-7* that is generated is exported from the nucleus by Exportin 5. Cytoplasmic LIN28 also binds the stem-loop (10) and recruits the terminal-uridyl-transferase enzyme ZCCHC11 (10,11), resulting in 3' uridylation of *pre-let-7*, preventing subsequent processing by Dicer and targeting the *pre-let-7* for degradation (12). In malignant-GCTs, the high LIN28 levels are also likely to prevent KSRP binding to the stem-loop of both *pri-let-7* and *pre-let-7* molecules (13), preventing the promotion of *let-7* maturation. Consequently, low levels of all mature *let-7* family members are observed in malignant-GCTs. This is likely to contribute to increased expression of pro-malignant genes, including *MYCN* and *LIN28*. Accordingly, double-negative feedback is likely to contribute to the maintenance of high levels of *LIN28* in malignant-GCT cells. In addition, malignant-GCTs show down-regulation of other microRNAs (17) that regulate *LIN28* via 3'UTR binding sites, e.g. miR-9, miR-30 family, miR-125 and miR-181 (14-16), providing a likely further potential contribution to high *LIN28* levels.

## Legends to Supplementary Tables

**Supplementary Table-S1. Clinico-pathological data for sample set-3.** These samples were principally used as a largely independent set for qRT-PCR validation of mRNA microarray profiling data. Of the 26 clinical specimens in the set, 23 were from pediatric patients (<16y). Nineteen were gonadal and seven extragonadal.

**Supplementary Table-S2. Primers used for mRNA qRT-PCR.**

**Supplementary Table-S3. Expression of *let-7* family microRNAs in pediatric malignant-GCTs.** Data are from our previous analysis of sample set-1 (17). Fold-change is versus 14 non-malignant control samples (teratomas and normal gonadal controls). The microRNAs are ranked by adjusted *p*-value. The common 2-7nt seed sequence is underlined.

**Supplementary Table-S4. *Let-7* mRNA targets identified in combined microarray analysis of pediatric and adult malignant-GCTs.** The 27 genes are ranked by fold-change in our microarray analysis of pediatric malignant-GCTs (sample set-1). The adult tumors were those in sample set-2. The linear-regression *p*-value was derived for the twenty set-1 samples with matched microRNA and mRNA profiles. The 16 genes selected for further analysis are highlighted in grey.

**Supplementary Table-S5. The six *let-7* mRNA targets selected following microarray and qRT-PCR analysis.** The linear-regression *p*-value was derived from qRT-PCR analysis of *let-7e* and target gene levels in sample set-3.

## References for Supplementary Information

1. Heidel JD, Liu JY, Yen Y, Zhou B, Heale BS, Rossi JJ, et al. Potent siRNA inhibitors of ribonucleotide reductase subunit RRM2 reduce cell proliferation in vitro and in vivo. *Clin Cancer Res.* 2007;13:2207-15.
2. Bensaad K, Tsuruta A, Selak MA, Vidal MN, Nakano K, Bartrons R, et al. TIGAR, a p53-inducible regulator of glycolysis and apoptosis. *Cell.* 2006;126:107-20.
3. Pena-Rico MA, Calvo-Vidal MN, Villalonga-Planells R, Martinez-Soler F, Gimenez-Bonafe P, Navarro-Sabate A, et al. TP53 induced glycolysis and apoptosis regulator (TIGAR) knockdown results in radiosensitization of glioma cells. *Radiother Oncol.* 2011;101:132-9.
4. Alagaratnam S, Lind GE, Kraggerud SM, Lothe RA, Skotheim RI. The testicular germ cell tumour transcriptome. *Int J Androl.* 2011;34:e133-50; discussion e50-1.
5. Bordow SB, Norris MD, Haber PS, Marshall GM, Haber M. Prognostic significance of MYCN oncogene expression in childhood neuroblastoma. *J Clin Oncol.* 1998;16:3286-94.
6. Lucena-Araujo AR, de Oliveira FM, Leite-Cueva SD, dos Santos GA, Falcao RP, Rego EM. High expression of AURKA and AURKB is associated with unfavorable cytogenetic abnormalities and high white blood cell count in patients with acute myeloid leukemia. *Leuk Res.* 2011;35:260-4.
7. Morozova O, Vojvodic M, Grinshtein N, Hansford LM, Blakely KM, Maslova A, et al. System-level analysis of neuroblastoma tumor-initiating cells implicates AURKB as a novel drug target for neuroblastoma. *Clin Cancer Res.* 2010;16:4572-82.

8. Berney DM, Shamash J, Hendry WF, Arora A, Jordan S, Oliver RT. Prediction of relapse after lymph node dissection for germ cell tumours: can salvage chemotherapy be avoided? *Br J Cancer*. 2001;84:340-3.
9. D'Angiolella V, Donato V, Vijayakumar S, Saraf A, Florens L, Washburn MP, et al. SCF(Cyclin F) controls centrosome homeostasis and mitotic fidelity through CP110 degradation. *Nature*. 2010;466:138-42.
10. Heo I, Joo C, Kim YK, Ha M, Yoon MJ, Cho J, et al. TUT4 in concert with Lin28 suppresses microRNA biogenesis through pre-microRNA uridylation. *Cell*. 2009;138:696-708.
11. Hagan JP, Piskounova E, Gregory RI. Lin28 recruits the TUTase Zcchc11 to inhibit let-7 maturation in mouse embryonic stem cells. *Nat Struct Mol Biol*. 2009;16:1021-5.
12. Heo I, Joo C, Cho J, Ha M, Han J, Kim VN. Lin28 mediates the terminal uridylation of let-7 precursor MicroRNA. *Mol Cell*. 2008;32:276-84.
13. Trabucchi M, Briata P, Garcia-Mayoral M, Haase AD, Filipowicz W, Ramos A, et al. The RNA-binding protein KSRP promotes the biogenesis of a subset of microRNAs. *Nature*. 2009;459:1010-4.
14. Li X, Zhang J, Gao L, McClellan S, Finan MA, Butler TW, et al. MiR-181 mediates cell differentiation by interrupting the Lin28 and let-7 feedback circuit. *Cell Death Differ*. 2012;19:378-86.
15. Wu L, Belasco JG. Micro-RNA regulation of the mammalian lin-28 gene during neuronal differentiation of embryonal carcinoma cells. *Mol Cell Biol*. 2005;25:9198-208.

16. Zhong X, Li N, Liang S, Huang Q, Coukos G, Zhang L. Identification of microRNAs regulating reprogramming factor LIN28 in embryonic stem cells and cancer cells. *J Biol Chem*. 2010;285:41961-71.
17. Palmer RD, Murray MJ, Saini HK, van Dongen S, Abreu-Goodger C, Muralidhar B, et al. Malignant germ cell tumors display common microRNA profiles resulting in global changes in expression of messenger RNA targets. *Cancer Res*. 2010;70:2911-23.
